# Supplementary material for: Terminal fucosylation of haptoglobin in cancer-derived exosomes during cholangiocarcinoma progression
Source: PubMed Central journal article supplement (PMC10165115; doi:10.3389/fonc.2023.1183442), 2023-04-24
Supplement: DataSheet_1.pdf [file DataSheet_1.pdf]

## *Supplementary Material*

### **Terminal fucosylation of haptoglobin in cancer-derived exosomes during cholangiocarcinoma progression**

**Hyewon Choi<sup>1</sup>, Sungeun Ju<sup>1</sup>, Keunsoo Kang<sup>2</sup>, Moon-Hyeong Seo<sup>3</sup>, Jin-Man Kim<sup>4</sup>, Eiji-Miyoshi<sup>5</sup>, Min-Kyung Yeo<sup>4,\*</sup>, Seung-Yeol Park<sup>1,\*</sup>**

<sup>1</sup> Department of Life Sciences, Pohang University of Science and Technology (POSTECH), Pohang, Gyeongbuk, Republic of Korea

<sup>2</sup> Department of Microbiology, Dankook University, Cheonan, Chungnam, Republic of Korea

<sup>3</sup> Natural Product Research Center, Korea Institute of Science and Technology, Gangneung, Republic of Korea

<sup>4</sup> Department of Pathology, Chungnam National University School of Medicine, Daejeon, Republic of Korea

<sup>5</sup> Department of Molecular Biochemistry and Clinical Investigation, Osaka University Graduate School of Medicine, 1-7 Yamada-oka, Suita, Osaka, Japan

**\* Correspondence:**

Professor. M.-K.Y. (Department of Pathology, Chungnam National University School of Medicine, Munwha-ro 282, Daejeon 35015, Republic of Korea, phone: +82-42-280-7196, e-mail: [mkyeo83@cnu.ac.kr](mailto:mkyeo83@cnu.ac.kr))

Professor. S.-Y.P. (Department of Life Sciences, POSTECH, Chungam-ro 77, Pohang, Gyeongbuk 37673, Republic of Korea, phone: +82-54-279-2325, e-mail: [seungpark@postech.ac.kr](mailto:seungpark@postech.ac.kr))

1 Supplementary Figures and Tables

1.1 Supplementary Figure 1

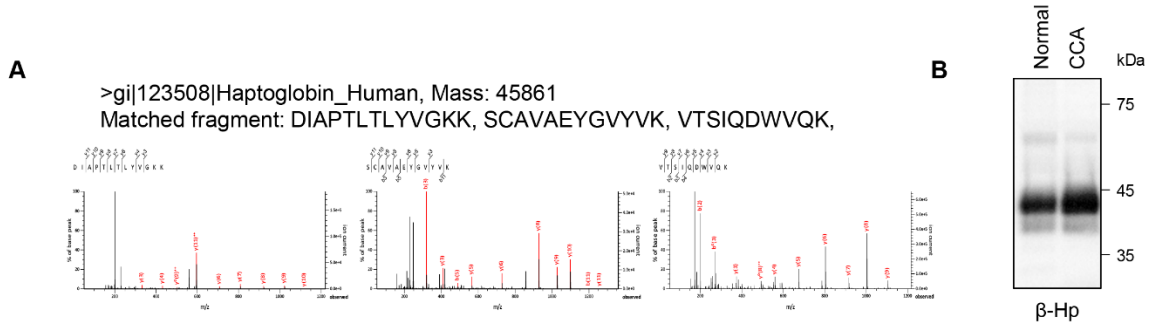

**Supplementary Figure 1. Identification of 40kDa protein with aberrant fucosylation in CCA.**

(A) Mass spectrum of 40kDa protein. The identified peptides matched the sequence of  $\beta$ -Hp. (B) Western blot assessing the amount of  $\beta$ -Hp in membrane-bound fraction isolated from healthy volunteers and patients with CCA; n = 3.

1.2 Supplementary Figure 2

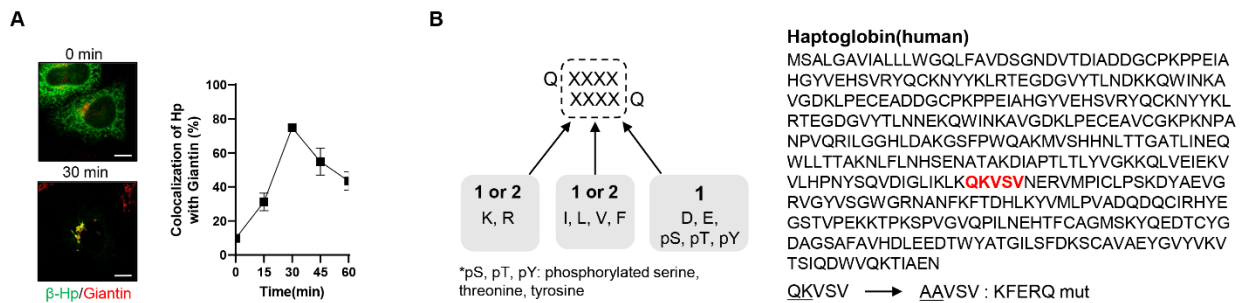

**Supplementary Figure 2. Further characterization of  $\beta$ -Hp secreted through EV.**

(A) RUSH assay to assess the real-time tracking of  $\beta$ -Hp secretion. Representative confocal images are shown, Scale bar = 10  $\mu$ m. n = 3. (B) (left) Scheme of canonical and phosphorylation-generated KFERQ-like motifs. (right) KFERQ-like motif in haptoglobin.

1.3 Supplementary Figure 3

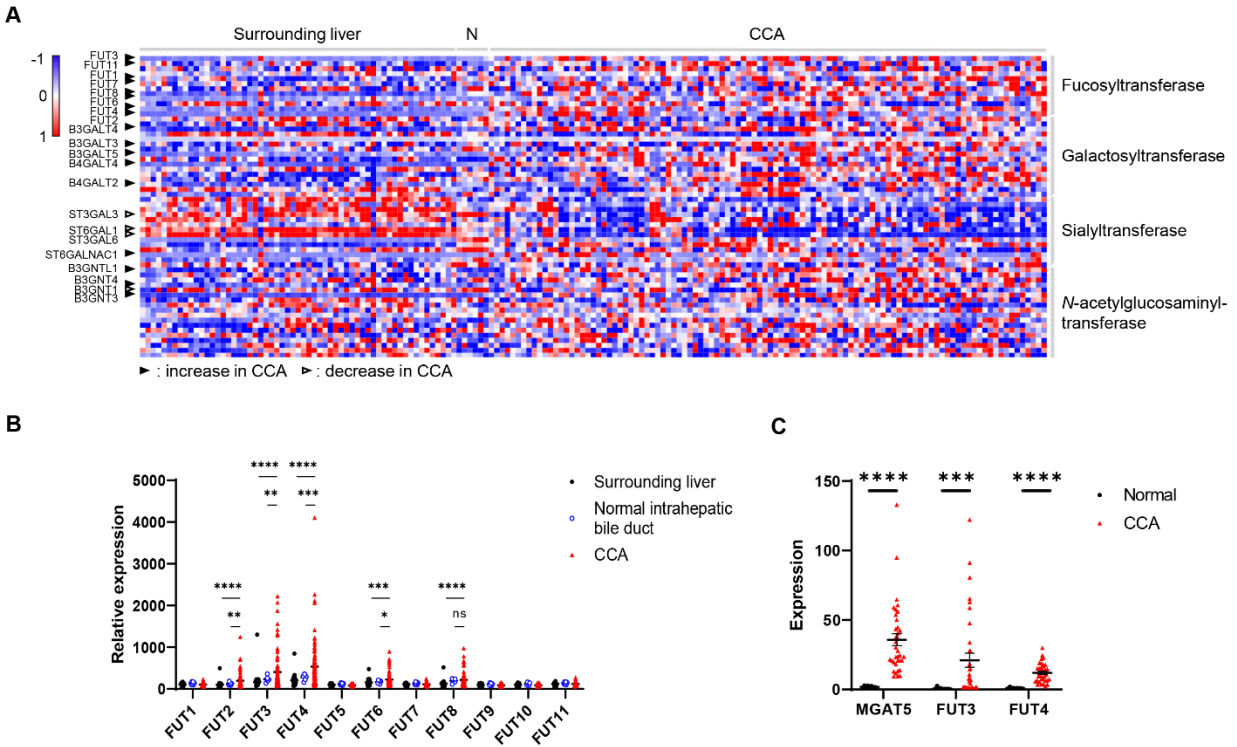

**Supplementary Figure 3. Expression profile of genes involving glycosylation biosynthesis.**

Quantitative data are shown as mean  $\pm$  S.E.M. Statistical analysis was performed using the Mann-Whitney u-test: \*\*\*\* $p < 0.0001$ , \*\*\* $p < 0.001$ , \*\* $p < 0.01$ , \* $p < 0.05$ , ns  $P > 0.05$ . (A) The heatmap represents the expression level (log 2-fold change) of genes in the surrounding liver, normal intrahepatic bile duct (N), and CCA. (B) Expression profiles of fucosyltransferases (FUTs) required for  $\alpha$ -fucosylation. (C) Expression profiles of MGAT5, FUT3, and FUT4 evaluated in OncoDB.

**1.4 Supplementary Figure 4**

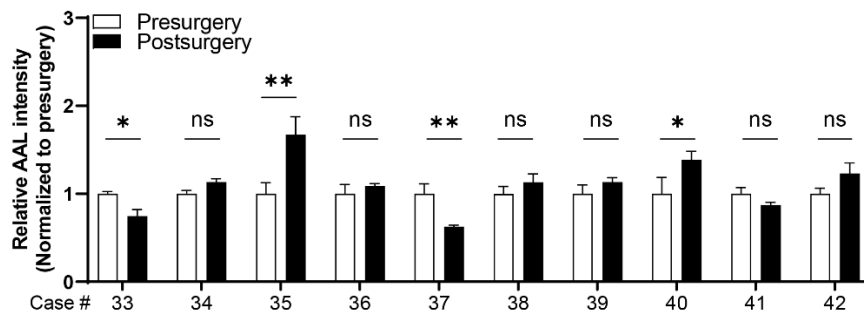

**Supplementary Figure 4. Effect of pre- and post-surgery on fucosylation degree of unfractionated serum.** Quantitative data are shown as mean  $\pm$  S.E.M. Statistical analysis was performed using the two-tailed Student's t-test: \*\*p < 0.01, \*p < 0.05, ns P > 0.05. AAL blotting for unfractionated serum collected from CCA patients before and after the surgery to remove tumors. Fucosylation level was determined using blotting index; n = 5.

### 1.5 Supplementary Table 1

**Supplementary Table 1. Clinical information of CCA cases.** F: female, M: male, EHCC: extrahepatic cholangiocarcinoma, IHCC: intrahepatic cholangiocarcinoma.

| Case No. | Age | Sex | Location | Tstage | Nstage | Mstage | TNM stage (AJCC) |
|----------|-----|-----|----------|--------|--------|--------|------------------|
| 1        | 77  | F   | EHBD     | T1     | N1     | M0     | IIA              |
| 2        | 42  | F   | EHBD     | T3b    | N1     | M0     | IIIA             |
| 3        | 51  | M   | EHBD     | T2     | N1     | M0     | IIB              |
| 4        | 70  | M   | EHBD     | T2a    | N0     | M1     | IVB              |
| 5        | 53  | M   | EHBD     | T3a    | N1     | M0     | IIIA             |
| 6        | 82  | F   | EHBD     | T1     | N0     | M0     | I                |
| 7        | 78  | M   | EHBD     | T2     | N0     | M0     | IIA              |
| 8        | 53  | M   | IHBD     | T1a    | N0     | M0     | IA               |
| 9        | 62  | F   | IHBD     | T2     | N0     | M0     | II               |
| 10       | 77  | F   | IHBD     | T2     | N0     | M0     | II               |
| 11       | 69  | F   | EHBD     | T3     | N0     | M0     | IIB              |
| 12       | 56  | M   | EHBD     | T2     | N0     | M0     | IIA              |
| 13       | 71  | F   | EHBD     | T2     | N0     | M0     | IIA              |
| 14       | 61  | M   | EHBD     | T2     | N0     | M0     | IIA              |
| 15       | 76  | M   | EHBD     | T2     | N1     | M0     | IIB              |
| 16       | 69  | M   | IHBD     | T3     | N0     | M0     | IIIA             |

| 17                                              | 73         | M          | EHBD            | T3            | N0            | M0            | IIB                     |                                  |
|-------------------------------------------------|------------|------------|-----------------|---------------|---------------|---------------|-------------------------|----------------------------------|
| 18                                              | 69         | M          | EHBD            | T2            | N0            | M0            | IIA                     |                                  |
| 19                                              | 72         | M          | EHBD            | T2            | N0            | M0            | IIA                     |                                  |
| 20                                              | 61         | M          | IHBD            | T1a           | N0            | M0            | IA                      |                                  |
| 21                                              | 77         | M          | EHBD            | T3            | N0            | M0            | IIB                     |                                  |
| 22                                              | 73         | F          | EHBD            | T1            | N0            | M0            | I                       |                                  |
| 23                                              | 77         | M          | IHBD            | T1a           | N0            | M0            | II                      |                                  |
| 24                                              | 73         | F          | IHBD            | T1a           | N0            | M0            | II                      |                                  |
| 25                                              | 64         | M          | EHBD            | T2            | N1            | M0            | IIB                     |                                  |
| 26                                              | 69         | M          | EHBD            | T2b           | N0            | M0            | II                      |                                  |
| 27                                              | 70         | M          | EHBD            | T3a           | N1            | M0            | IIIA                    |                                  |
| 28                                              | 74         | M          | EHBD            | T2            | N0            | M0            | IIA                     |                                  |
| 29                                              | 77         | F          | EHBD            | T2a           | N0            | M0            | II                      |                                  |
| 30                                              | 70         | M          | EHBD            | T3            | N0            | M0            | IIB                     |                                  |
| 31                                              | 56         | M          | EHBD            | T2b           | N0            | M0            | II                      |                                  |
| 32                                              | 75         | M          | IHBD            | T2            | N0            | M0            | II                      |                                  |
| <b>Serum collected before and after surgery</b> |            |            |                 |               |               |               |                         |                                  |
| <b>Case No.</b>                                 | <b>Age</b> | <b>Sex</b> | <b>Location</b> | <b>Tstage</b> | <b>Nstage</b> | <b>Mstage</b> | <b>TNM stage (AJCC)</b> | <b>Postsurgery CA19-9 (unit)</b> |
| 33                                              | 69         | M          | EHBD            | T1            | N0            | M0            | I                       | 16                               |
| 34                                              | 64         | M          | IHBD            | T1a           | N0            | M0            | IA                      | 5.64                             |
| 35                                              | 74         | M          | EHBD            | T1            | N0            | M0            | I                       | 8.24                             |
| 36                                              | 84         | M          | EHBD            | T2a           | N0            | M0            | II                      | 2.78                             |
| 37                                              | 56         | M          | EHBD            | T2            | N0            | M0            | IB                      | 16.1                             |

## Supplementary Material

|    |    |   |      |     |    |    |      |       |
|----|----|---|------|-----|----|----|------|-------|
| 38 | 66 | F | EHBD | T4  | N1 | M0 | IIIB | 362.1 |
| 39 | 65 | M | EHBD | T2b | N0 | M0 | II   | 2516  |
| 40 | 65 | F | IHBD | T3  | N1 | M0 | IIIB | 4262  |
| 41 | 79 | F | EHBD | T2  | N0 | M0 | IIA  | 4.87  |
| 42 | 75 | M | IHBD | T2  | N0 | M0 | II   | 21.74 |
